# Supplementary material
Source: publisher figshare collection journal article supplement (https://rs.figshare.com/ndownloader/files/14126384)
Supplement: Supplementary file 1 [file 14126384]

**Calculation S1.** Mathematical solution to convert 2-dimensional (2D) observed velocities during swimming, jumping and prey capture to 3-dimensional (3D) velocities.

The velocity vector in 3D can be written  $(U^*X, U^*Y, U^*Z)$  where  $U$  is the speed and  $(X, Y, Z)$  is a point on the unit sphere. The objective is to estimate the mean value of  $U$ , based on observations of the mean of the 2D-projection  $(U^*X, U^*Y)$ . We assume isotropy, i.e.  $(X, Y, Z)$  is uniformly distributed on this sphere, independently of  $U$ . The speed of the 2D-projection is

$$V = U(X^2 + Y^2)^{0.5} \quad (1)$$

To find the relationship between the mean 3-dimensional speed,  $E(U)$ , which we want to know, and the mean 2-dimensional speed,  $E(V)$ , which we have observed, we use the fact that each of the co-ordinates  $(X, Y, Z)$  is uniformly distributed between -1 and +1. The length of the 2D projection,  $(X^2 + Y^2)^{0.5}$ , can therefore be found as

$$E[(X^2 + Y^2)^{0.5}] = E[(1 - Z^2)^{0.5}] = \int_{-1}^1 0.5(1 - Z^2)^{0.5} dZ = \pi/4 \quad (2)$$

so that

$$E(V) = E(U) \frac{\pi}{4}. \quad (3)$$
